# Supplementary material
Source: publisher figshare collection journal article supplement (https://acs.figshare.com/ndownloader/files/5061088)
Supplement: Supplementary file 1 [file 5061088]

data_publication_text
_publ_contact_author_name        'Jon Zubieta'
_publ_contact_author_address     
;Department of Chemistry
111 College Place
Syracuse University
Syracuse, NY 13244	
;   
data_[NH3CH3]2[V4O4(OH)2{O3P(CH2)3PO3}2]3H2O  4h
  
_audit_creation_method            SHELXL-97 
_chemical_name_systematic 
; 
 ? 
; 
_chemical_name_common             ? 
_chemical_melting_point           ? 
_chemical_formula_moiety          ? 
_chemical_formula_sum 
 'C4 H16 N O10.50 P2 V2' 
_chemical_formula_weight          410.00 
  
loop_ 
 _atom_type_symbol 
 _atom_type_description 
 _atom_type_scat_dispersion_real 
 _atom_type_scat_dispersion_imag 
 _atom_type_scat_source 
 'C'  'C'   0.0033   0.0016 
 'International Tables Vol C Tables 4.2.6.8 and 6.1.1.4' 
 'H'  'H'   0.0000   0.0000 
 'International Tables Vol C Tables 4.2.6.8 and 6.1.1.4' 
 'N'  'N'   0.0061   0.0033 
 'International Tables Vol C Tables 4.2.6.8 and 6.1.1.4' 
 'O'  'O'   0.0106   0.0060 
 'International Tables Vol C Tables 4.2.6.8 and 6.1.1.4' 
 'P'  'P'   0.1023   0.0942 
 'International Tables Vol C Tables 4.2.6.8 and 6.1.1.4' 
 'V'  'V'   0.3005   0.5294 
 'International Tables Vol C Tables 4.2.6.8 and 6.1.1.4' 
  
_symmetry_cell_setting            Monoclinic 
_symmetry_space_group_name_H-M    C2/c 
  
loop_ 
 _symmetry_equiv_pos_as_xyz 
 'x, y, z' 
 '-x, y, -z+1/2' 
 'x+1/2, y+1/2, z' 
 '-x+1/2, y+1/2, -z+1/2' 
 '-x, -y, -z' 
 'x, -y, z-1/2' 
 '-x+1/2, -y+1/2, -z' 
 'x+1/2, -y+1/2, z-1/2' 
  
_cell_length_a                    15.003(3) 
_cell_length_b                    10.126(2) 
_cell_length_c                    18.604(4) 
_cell_angle_alpha                 90.00 
_cell_angle_beta                  101.00(3) 
_cell_angle_gamma                 90.00 
_cell_volume                      2774.3(10) 
_cell_formula_units_Z             8 
_cell_measurement_temperature     90(2) 
_cell_measurement_reflns_used     3756 
_cell_measurement_theta_min       2.23 
_cell_measurement_theta_max       28.41 
  
_exptl_crystal_description        rod 
_exptl_crystal_colour             blue 
_exptl_crystal_size_max           0.50 
_exptl_crystal_size_mid           0.16 
_exptl_crystal_size_min           0.02 
_exptl_crystal_density_meas       ? 
_exptl_crystal_density_diffrn     1.963 
_exptl_crystal_density_method     'not measured' 
_exptl_crystal_F_000              1656 
_exptl_absorpt_coefficient_mu     1.625 
_exptl_absorpt_correction_type    multi-scan 
_exptl_absorpt_correction_T_min   0.4970 
_exptl_absorpt_correction_T_max   0.9682 
_exptl_absorpt_process_details    'SADABS SHELXL-97 (SHELDRICK, 1997)' 
  
_exptl_special_details 
; 
 ? 
; 
  
_diffrn_ambient_temperature      90(2)
_diffrn_radiation_wavelength     0.71073
_diffrn_source                   'fine-focus sealed tube'
_diffrn_radiation_type           MoK\a
_diffrn_radiation_probe          x-ray
_diffrn_radiation_monochromator  graphite
_diffrn_measurement_device_type  'APEX CCD area detector'
_diffrn_measurement_method       'Phi and omega scans'
_diffrn_detector_area_resol_mean 512
_diffrn_standards_number         ?
_diffrn_standards_interval_count ?
_diffrn_standards_interval_time  ?
_diffrn_standards_decay_%        0.001
_diffrn_reflns_number             3756 
_diffrn_reflns_av_R_equivalents   0.0212 
_diffrn_reflns_av_sigmaI/netI     0.0302 
_diffrn_reflns_limit_h_min        -20 
_diffrn_reflns_limit_h_max        19 
_diffrn_reflns_limit_k_min        0 
_diffrn_reflns_limit_k_max        13 
_diffrn_reflns_limit_l_min        0 
_diffrn_reflns_limit_l_max        24 
_diffrn_reflns_theta_min          2.23 
_diffrn_reflns_theta_max          28.41 
_reflns_number_total              5213 
_reflns_number_gt                 4806 
_reflns_threshold_expression      >2sigma(I) 
  
_computing_data_collection        'Bruker SMART' 
_computing_cell_refinement        'Bruker SMART' 
_computing_data_reduction         'Bruker SAINT' 
_computing_structure_solution     'SHELXS-97 (Sheldrick, 1990)' 
_computing_structure_refinement   'SHELXL-97 (Sheldrick, 1997)' 
_computing_molecular_graphics     'Bruker SHELXTL' 
_computing_publication_material   'Bruker SHELXTL'
  
_refine_special_details 
; 
 Refinement of F^2^ against ALL reflections.  The weighted R-factor wR and 
 goodness of fit S are based on F^2^, conventional R-factors R are based 
 on F, with F set to zero for negative F^2^. The threshold expression of 
 F^2^ > 2sigma(F^2^) is used only for calculating R-factors(gt) etc. and is 
 not relevant to the choice of reflections for refinement.  R-factors based 
 on F^2^ are statistically about twice as large as those based on F, and R- 
 factors based on ALL data will be even larger. 
; 
  
_refine_ls_structure_factor_coef  Fsqd 
_refine_ls_matrix_type            full 
_refine_ls_weighting_scheme       calc 
_refine_ls_weighting_details 
 'calc w=1/[\s^2^(Fo^2^)+(0.0000P)^2^+65.8412P] where P=(Fo^2^+2Fc^2^)/3' 
_atom_sites_solution_primary      direct 
_atom_sites_solution_secondary    difmap 
_atom_sites_solution_hydrogens    geom 
_refine_ls_hydrogen_treatment     mixed 
_refine_ls_extinction_method      none 
_refine_ls_extinction_coef        ? 
_refine_ls_number_reflns          5213 
_refine_ls_number_parameters      202 
_refine_ls_number_restraints      0 
_refine_ls_R_factor_all           0.0677 
_refine_ls_R_factor_gt            0.0803 
_refine_ls_wR_factor_ref          0.1694 
_refine_ls_wR_factor_gt           0.1454 
_refine_ls_goodness_of_fit_ref    1.300 
_refine_ls_restrained_S_all       1.300 
_refine_ls_shift/su_max           0.814 
_refine_ls_shift/su_mean          0.004 
  
loop_ 
 _atom_site_label 
 _atom_site_type_symbol 
 _atom_site_fract_x 
 _atom_site_fract_y 
 _atom_site_fract_z 
 _atom_site_U_iso_or_equiv 
 _atom_site_adp_type 
 _atom_site_occupancy 
 _atom_site_symmetry_multiplicity 
 _atom_site_calc_flag 
 _atom_site_refinement_flags 
 _atom_site_disorder_assembly 
 _atom_site_disorder_group 
V1 V 0.15898(6) 0.38593(9) 0.08585(5) 0.00815(19) Uani 1 1 d . . . 
V2 V 0.25318(6) -0.04587(9) 0.21865(5) 0.00768(19) Uani 1 1 d . . . 
P1 P 0.28574(9) 0.12254(13) 0.07702(7) 0.0075(3) Uani 1 1 d . . . 
P2 P 0.16260(9) -0.33013(13) 0.16686(7) 0.0066(3) Uani 1 1 d . . . 
O1 O 0.1760(3) 0.5759(4) 0.10549(19) 0.0096(7) Uani 1 1 d . . . 
O2 O 0.2079(3) 0.4282(4) -0.0009(2) 0.0103(8) Uani 1 1 d . . . 
O3 O 0.0517(3) 0.3675(4) 0.0652(2) 0.0170(9) Uani 1 1 d . . . 
O4 O 0.1992(3) 0.3577(5) 0.1911(2) 0.0186(10) Uani 1 1 d . . . 
O5 O 0.2000(3) 0.2018(4) 0.0770(2) 0.0116(8) Uani 1 1 d . . . 
O6 O 0.2873(2) 0.0005(4) 0.12562(19) 0.0088(7) Uani 1 1 d . . . 
O7 O 0.3334(3) 0.0988(4) 0.2599(2) 0.0106(7) Uani 1 1 d . . . 
O8 O 0.1538(3) 0.0072(4) 0.2225(2) 0.0205(9) Uani 1 1 d . . . 
O9 O 0.2342(3) -0.2218(4) 0.1724(2) 0.0106(7) Uani 1 1 d . . . 
O90 O 0.0000 0.2411(15) 0.2500 0.105(5) Uani 1 2 d S . . 
O92 O 0.0433(9) 0.1423(13) 0.3071(8) 0.057(4) Uani 0.50 1 d P . . 
O91 O 0.0329(7) 0.0625(10) 0.0677(6) 0.032(2) Uani 0.50 1 d P . . 
N1A N 0.8763(6) 0.2966(8) 0.0743(5) 0.021(2) Uani 0.599(13) 1 d P A 1 
H1A1 H 0.8855 0.3801 0.0888 0.032 Uiso 0.599(13) 1 calc PR A 1 
H1A2 H 0.9201 0.2714 0.0511 0.032 Uiso 0.599(13) 1 calc PR A 1 
H1A3 H 0.8768 0.2452 0.1132 0.032 Uiso 0.599(13) 1 calc PR A 1 
N1B N 0.8570(9) 0.1805(13) 0.0393(8) 0.023(4) Uani 0.401(13) 1 d P A 2 
H1B1 H 0.9058 0.2131 0.0687 0.034 Uiso 0.401(13) 1 calc PR A 2 
H1B2 H 0.8721 0.1537 -0.0024 0.034 Uiso 0.401(13) 1 calc PR A 2 
H1B3 H 0.8357 0.1123 0.0610 0.034 Uiso 0.401(13) 1 calc PR A 2 
C1 C 0.3826(3) 0.2243(5) 0.1102(3) 0.0109(10) Uani 1 1 d . . . 
H1A H 0.3867 0.2918 0.0740 0.013 Uiso 1 1 calc R . . 
H1B H 0.3734 0.2685 0.1545 0.013 Uiso 1 1 calc R . . 
C2 C 0.4724(3) 0.1495(5) 0.1268(3) 0.0105(10) Uani 1 1 d . . . 
H2A H 0.4786 0.0957 0.0849 0.013 Uiso 1 1 calc R . . 
H2B H 0.4727 0.0912 0.1682 0.013 Uiso 1 1 calc R . . 
C3 C 0.0527(3) -0.2550(5) 0.1443(3) 0.0100(10) Uani 1 1 d . . . 
H3A H 0.0441 -0.1996 0.1849 0.012 Uiso 1 1 calc R . . 
H3B H 0.0516 -0.1979 0.1022 0.012 Uiso 1 1 calc R . . 
C4 C 0.7856(7) 0.2851(9) 0.0232(6) 0.055(3) Uani 1 1 d . . . 
H4 H 0.208(5) 0.304(6) 0.198(4) 0.000(18) Uiso 1 1 d . . . 
  
loop_ 
 _atom_site_aniso_label 
 _atom_site_aniso_U_11 
 _atom_site_aniso_U_22 
 _atom_site_aniso_U_33 
 _atom_site_aniso_U_23 
 _atom_site_aniso_U_13 
 _atom_site_aniso_U_12 
V1 0.0105(4) 0.0053(4) 0.0089(4) -0.0013(3) 0.0028(3) 0.0007(3) 
V2 0.0089(4) 0.0058(4) 0.0087(4) -0.0012(3) 0.0025(3) -0.0011(3) 
P1 0.0100(6) 0.0051(6) 0.0071(6) -0.0006(5) 0.0007(5) 0.0002(5) 
P2 0.0090(6) 0.0042(6) 0.0067(6) -0.0003(5) 0.0020(5) 0.0008(5) 
O1 0.0162(18) 0.0056(17) 0.0075(16) 0.0002(13) 0.0037(14) -0.0018(14) 
O2 0.0174(19) 0.0083(18) 0.0074(17) -0.0018(14) 0.0078(15) -0.0008(14) 
O3 0.0135(19) 0.0076(19) 0.029(2) -0.0022(17) 0.0031(17) 0.0003(15) 
O4 0.038(3) 0.004(2) 0.012(2) -0.0011(17) 0.0008(18) 0.0053(19) 
O5 0.0128(18) 0.0073(17) 0.0141(18) 0.0001(15) 0.0015(15) 0.0008(15) 
O6 0.0134(17) 0.0065(17) 0.0069(16) -0.0002(14) 0.0033(14) -0.0008(14) 
O7 0.0148(18) 0.0067(17) 0.0104(17) -0.0016(14) 0.0028(14) -0.0047(15) 
O8 0.019(2) 0.021(2) 0.024(2) -0.0097(18) 0.0077(18) 0.0022(18) 
O9 0.0129(18) 0.0080(18) 0.0115(17) -0.0044(15) 0.0041(14) -0.0018(14) 
O90 0.088(10) 0.098(11) 0.124(12) 0.000 0.006(9) 0.000 
O92 0.062(9) 0.038(7) 0.076(10) -0.017(7) 0.030(8) 0.001(6) 
O91 0.027(5) 0.030(5) 0.039(6) -0.006(5) 0.006(4) -0.012(4) 
N1A 0.025(5) 0.008(4) 0.035(5) 0.001(4) 0.019(4) 0.000(3) 
N1B 0.026(7) 0.016(7) 0.029(7) -0.006(6) 0.014(6) -0.005(6) 
C1 0.011(2) 0.007(2) 0.015(3) -0.003(2) 0.0027(19) 0.001(2) 
C2 0.010(2) 0.007(2) 0.014(2) -0.003(2) 0.0017(19) -0.0008(19) 
C3 0.010(2) 0.007(2) 0.013(2) 0.0017(19) 0.0016(19) -0.0008(19) 
C4 0.070(7) 0.037(5) 0.057(6) -0.003(4) 0.015(5) -0.001(5) 
  
_geom_special_details 
; 
 All esds (except the esd in the dihedral angle between two l.s. planes) 
 are estimated using the full covariance matrix.  The cell esds are taken 
 into account individually in the estimation of esds in distances, angles 
 and torsion angles; correlations between esds in cell parameters are only 
 used when they are defined by crystal symmetry.  An approximate (isotropic) 
 treatment of cell esds is used for estimating esds involving l.s. planes. 
; 
  
loop_ 
 _geom_bond_atom_site_label_1 
 _geom_bond_atom_site_label_2 
 _geom_bond_distance 
 _geom_bond_site_symmetry_2 
 _geom_bond_publ_flag 
V1 O3 1.592(4) . ? 
V1 O2 1.943(4) . ? 
V1 O4 1.957(5) . ? 
V1 O1 1.965(4) . ? 
V1 O5 1.980(4) . ? 
V2 O8 1.599(4) . ? 
V2 O6 1.954(4) . ? 
V2 O4 1.955(4) 4_545 ? 
V2 O7 1.957(4) . ? 
V2 O9 1.975(4) . ? 
P1 O5 1.517(4) . ? 
P1 O2 1.527(4) 7 ? 
P1 O6 1.529(4) . ? 
P1 C1 1.792(5) . ? 
P2 O9 1.525(4) . ? 
P2 O1 1.529(4) 1_545 ? 
P2 O7 1.532(4) 4_545 ? 
P2 C3 1.792(5) . ? 
O1 P2 1.529(4) 1_565 ? 
O2 P1 1.527(4) 7 ? 
O4 V2 1.955(4) 4 ? 
O7 P2 1.532(4) 4 ? 
N1A C4 1.508(13) . ? 
N1B C4 1.495(16) . ? 
C1 C2 1.525(7) . ? 
C2 C3 1.531(7) 3 ? 
C3 C2 1.531(7) 3_445 ? 
C4 C4 1.43(2) 7_655 ? 
  
loop_ 
 _geom_angle_atom_site_label_1 
 _geom_angle_atom_site_label_2 
 _geom_angle_atom_site_label_3 
 _geom_angle 
 _geom_angle_site_symmetry_1 
 _geom_angle_site_symmetry_3 
 _geom_angle_publ_flag 
O3 V1 O2 110.4(2) . . ? 
O3 V1 O4 109.2(2) . . ? 
O2 V1 O4 140.4(2) . . ? 
O3 V1 O1 104.42(18) . . ? 
O2 V1 O1 83.24(16) . . ? 
O4 V1 O1 87.27(17) . . ? 
O3 V1 O5 100.67(18) . . ? 
O2 V1 O5 88.08(16) . . ? 
O4 V1 O5 84.50(18) . . ? 
O1 V1 O5 154.90(16) . . ? 
O8 V2 O6 111.3(2) . . ? 
O8 V2 O4 108.7(2) . 4_545 ? 
O6 V2 O4 139.96(19) . 4_545 ? 
O8 V2 O7 103.8(2) . . ? 
O6 V2 O7 85.53(16) . . ? 
O4 V2 O7 86.59(18) 4_545 . ? 
O8 V2 O9 105.36(19) . . ? 
O6 V2 O9 82.60(16) . . ? 
O4 V2 O9 85.54(18) 4_545 . ? 
O7 V2 O9 150.76(16) . . ? 
O5 P1 O2 112.4(2) . 7 ? 
O5 P1 O6 110.2(2) . . ? 
O2 P1 O6 106.2(2) 7 . ? 
O5 P1 C1 109.1(2) . . ? 
O2 P1 C1 108.8(2) 7 . ? 
O6 P1 C1 109.9(2) . . ? 
O9 P2 O1 107.9(2) . 1_545 ? 
O9 P2 O7 111.7(2) . 4_545 ? 
O1 P2 O7 112.5(2) 1_545 4_545 ? 
O9 P2 C3 108.4(2) . . ? 
O1 P2 C3 109.6(2) 1_545 . ? 
O7 P2 C3 106.6(2) 4_545 . ? 
P2 O1 V1 135.8(2) 1_565 . ? 
P1 O2 V1 142.8(2) 7 . ? 
V2 O4 V1 141.1(3) 4 . ? 
P1 O5 V1 140.8(2) . . ? 
P1 O6 V2 137.8(2) . . ? 
P2 O7 V2 128.1(2) 4 . ? 
P2 O9 V2 136.0(2) . . ? 
C2 C1 P1 114.3(4) . . ? 
C1 C2 C3 111.0(4) . 3 ? 
C2 C3 P2 115.7(4) 3_445 . ? 
C4 C4 N1B 101.2(11) 7_655 . ? 
  
loop_ 
 _geom_torsion_atom_site_label_1 
 _geom_torsion_atom_site_label_2 
 _geom_torsion_atom_site_label_3 
 _geom_torsion_atom_site_label_4 
 _geom_torsion 
 _geom_torsion_site_symmetry_1 
 _geom_torsion_site_symmetry_2 
 _geom_torsion_site_symmetry_3 
 _geom_torsion_site_symmetry_4 
 _geom_torsion_publ_flag 
O3 V1 O1 P2 73.1(4) . . . 1_565 ? 
O2 V1 O1 P2 -177.5(3) . . . 1_565 ? 
O4 V1 O1 P2 -36.0(4) . . . 1_565 ? 
O5 V1 O1 P2 -106.9(5) . . . 1_565 ? 
O3 V1 O2 P1 -57.8(4) . . . 7 ? 
O4 V1 O2 P1 121.9(4) . . . 7 ? 
O1 V1 O2 P1 -160.7(4) . . . 7 ? 
O5 V1 O2 P1 42.9(4) . . . 7 ? 
O3 V1 O4 V2 -109.4(4) . . . 4 ? 
O2 V1 O4 V2 70.9(5) . . . 4 ? 
O1 V1 O4 V2 -5.1(4) . . . 4 ? 
O5 V1 O4 V2 151.2(5) . . . 4 ? 
O2 P1 O5 V1 -107.3(4) 7 . . . ? 
O6 P1 O5 V1 134.4(4) . . . . ? 
C1 P1 O5 V1 13.6(5) . . . . ? 
O3 V1 O5 P1 170.8(4) . . . . ? 
O2 V1 O5 P1 60.3(4) . . . . ? 
O4 V1 O5 P1 -80.7(4) . . . . ? 
O1 V1 O5 P1 -9.2(7) . . . . ? 
O5 P1 O6 V2 -38.3(4) . . . . ? 
O2 P1 O6 V2 -160.3(3) 7 . . . ? 
C1 P1 O6 V2 82.1(4) . . . . ? 
O8 V2 O6 P1 47.3(4) . . . . ? 
O4 V2 O6 P1 -135.1(3) 4_545 . . . ? 
O7 V2 O6 P1 -55.8(3) . . . . ? 
O9 V2 O6 P1 151.0(4) . . . . ? 
O8 V2 O7 P2 52.3(3) . . . 4 ? 
O6 V2 O7 P2 163.2(3) . . . 4 ? 
O4 V2 O7 P2 -56.1(3) 4_545 . . 4 ? 
O9 V2 O7 P2 -130.6(3) . . . 4 ? 
O1 P2 O9 V2 164.6(3) 1_545 . . . ? 
O7 P2 O9 V2 -71.2(4) 4_545 . . . ? 
C3 P2 O9 V2 46.0(4) . . . . ? 
O8 V2 O9 P2 -27.1(4) . . . . ? 
O6 V2 O9 P2 -137.2(4) . . . . ? 
O4 V2 O9 P2 81.1(4) 4_545 . . . ? 
O7 V2 O9 P2 155.9(3) . . . . ? 
O5 P1 C1 C2 168.8(4) . . . . ? 
O2 P1 C1 C2 -68.1(4) 7 . . . ? 
O6 P1 C1 C2 47.9(5) . . . . ? 
P1 C1 C2 C3 171.9(4) . . . 3 ? 
O9 P2 C3 C2 172.6(4) . . . 3_445 ? 
O1 P2 C3 C2 55.0(4) 1_545 . . 3_445 ? 
O7 P2 C3 C2 -67.1(4) 4_545 . . 3_445 ? 
  
_diffrn_measured_fraction_theta_max    0.955 
_diffrn_reflns_theta_full              28.41 
_diffrn_measured_fraction_theta_full   0.955 
_refine_diff_density_max    1.554 
_refine_diff_density_min   -1.350 
_refine_diff_density_rms    0.304 
loop_
_publ_author_name
_publ_author_address
'Wayne Ouellette'
;Department of Chemistry
111 College Place
Syracuse University
Syracuse, NY 13244	
;
